# Supplementary material for: Single-cell polyfunctional proteomics of CD4 cells from patients with AML predicts responses to anti–PD-1–based therapy
Source: PubMed Central journal article supplement — Blood Adv. 2021 Nov 16;5(22):4569–74. doi: 10.1182/bloodadvances.2021004583 (PMC8759127; doi:10.1182/bloodadvances.2021004583), 2021-11-16
Supplement: advancesADV2021004583-suppl1.pdf [file advancesADV2021004583-suppl1.pdf]

## Supplementary materials:

### Single-cell 32-plex functional proteomic profiling

Cryopreserved bone marrow samples were thawed and cultured in complete RPMI medium (Fisher Scientific) supplemented with 10 ng/mL IL-2 (Biolegend) at a density of  $1 \times 10^6$  cells/mL in a 37°C, 5% CO<sub>2</sub> incubator overnight. After overnight recovery, viable T cells were purified from dead cells using Ficoll-Paque Plus medium (GE Healthcare). CD8+ then CD4+ T-cell subsets were sequentially enriched using anti-CD8 or anti-CD4 MicroBeads (Miltenyi Biotec) and resuspended in complete RPMI media at a density of  $1 \times 10^6$ /mL. An aliquot of 100 µL of CD4+ or CD8+ T cell suspension was seeded into a well of 96-well flat-bottom plate precoated with anti-human CD3 (clone OKT3, Thermo Fisher/Invitrogen, 10 µg/ml in PBS at 4°C, O/N) with a supplement of soluble anti-human CD28 (clone CD28.2, Thermo Fisher/Invitrogen) at a final concentration of 5 µg/mL. After cultured at 37°C, 5% CO<sub>2</sub> for 24 hours, the cells were stained with Alexa Fluor 647-conjugated anti-CD4 or CD8 antibody (BioLegend) at room temperature for 10 minutes, rinsed once with complete RPMI and then resuspended in complete RPMI medium at a density of  $1 \times 10^6$ /mL. Approximately 30 µL of CD4+ or CD8+ T cell suspension was loaded into an IsoCode Chip (IsoPlexis) and incubated at 37°C, 5% CO<sub>2</sub> for additional 16 hours. Following this final incubation, subsequently secreted proteins from ~1000 single T cells were captured by the 32-plex antibody barcoded chip and analyzed by backend fluorescence ELISA-based assay. Polyfunctionality of T cells defined as a cell co-secreting 2+ cytokines was analyzed by the IsoSpeak software across the five functional groups (Supplementary Table 2). The polyfunctional strength Index (PSI) of T cells was computed using a pre-specified formula, defined as the percentage of polyfunctional cells, multiplied by the sum of the mean fluorescence intensity (MFI) of the proteins secreted by those cells<sup>7-10,19,21,22</sup>.

$$PSI_{sample} = (\% \text{ polyfunctional cells in sample}) \sum_{i=1}^{32} \text{MFI of secreted protein } i \text{ of the polyfunctional cells}$$

The functional groups of T cells were deconvoluted and visualized by 3D t-Distributed Stochastic Neighbor Embedding (3D-tSNE) and heatmap visualizations<sup>19-22</sup>. 3D t-SNE is a nonlinear dimensionality reduction tool used for visualizing multi-dimensional data in low-dimensional space (2D/3D) relying on computations based on algebraic topology and Riemannian geometry<sup>20</sup>. Briefly, as the raw MFI data feeds into the t-SNE algorithm and is subsequently transformed/reduced, it calculates similarities between data points and then tries to optimize where the data point would end up in this 3D space. 3D t-SNE of all single cells was

analyzed in the IsoSpeak software by using the following hyperparameters: theta: 0.5; perplexity: 50; maximum iterations: 1000.

**Supplementary Table 1**

| Characteristic                              | Overall, N = 16 | NR, N = 11    | Resp., N = 5      | p-value <sup>1</sup> |
|---------------------------------------------|-----------------|---------------|-------------------|----------------------|
| <b>Gender, n/N (%)</b>                      |                 |               |                   | >0.9                 |
| F                                           | 4/16 (25%)      | 3/11 (27%)    | 1/5 (20%)         |                      |
| M                                           | 12/16 (75%)     | 8/11 (73%)    | 4/5 (80%)         |                      |
| <b>Age (years)</b>                          | 67.2+/-11.9     | 66.5+/-12.2   | 68.6+/-12.4       | >0.9                 |
| <b>Cytogenetics, n/N (%)</b>                |                 |               |                   | >0.9                 |
| Complex, -5/-7                              | 8/16 (50%)      | 5/11 (45%)    | 3/5 (60%)         |                      |
| Diploid                                     | 1/16 (6.2%)     | 1/11 (9.1%)   | 0/5 (0%)          |                      |
| Miscellaneous                               | 7/16 (44%)      | 5/11 (45%)    | 2/5 (40%)         |                      |
| <b>Prior Hypomethylating Agents</b>         |                 |               |                   |                      |
| Yes                                         | 8/16 (50%)      | 7/11 (63.6%)  | 1/5 (20%)         |                      |
| No                                          | 8/16 (50%)      | 4/11 (36.3%)  | 4/5 (80%)         |                      |
| <b>Total Nivolumab Doses Mean+/-SD</b>      | 11.0+/-9.8      | 5.8+/-3.4     | 22.4+/-9.8        | 0.004                |
| <b>Bone marrow blasts, Mean+/-SD</b>        | 44.1+/-29.3     | 44.9+/-27.5   | 42.4+/-36.4       | 0.7                  |
| <b>Median Time to response (months)</b>     | N/A             | N/A           | 4.07 [0.9-12.6]   | N/A                  |
| <b>Median Overall Survival (months)</b>     | 6 [2.4-21.5]    | 5.7 [2.4-7.6] | 14.8 [9.4 – 21.5] | <0.001               |
| <b>Median Event Free Survival (months)</b>  | 4.6 [2.4-18.3]  | 4 [2.4-7.6]   | 12.6 [9.1-18.3]   | <0.001               |
| <b>Median Duration of Response (months)</b> | N/A             | NA+/-NA       | 5.2 [0.5-14.7]    | N/A                  |

**Supplementary Table 2**

| Functional Groups | Analytes                                                  |
|-------------------|-----------------------------------------------------------|
| Effector          | Granzyme B, TNF-a, IFN-g, MIP-1a, Perforin, TNF-b         |
| Stimulatory       | GM-CSF, IL-2, IL-5, IL-7, IL-8, IL-9, IL-12, IL-15, IL-21 |
| Chemoattractive   | CCL-11, IP-10, MIP-1b, RANTES                             |

|              |                                                   |
|--------------|---------------------------------------------------|
| Regulatory   | IL-4, IL-10, IL-13, IL-22, sCD137, sCD40L, TGF-b1 |
| Inflammatory | IL-6, IL-17A, IL-17F, MCP-1, MCP-4, IL-1b         |
